# Supplementary material for: Manganese Ion-Induced Amyloid Fibrillation Kinetics of Hen Egg White-Lysozyme in Thermal and Acidic Conditions
Source: PubMed Central journal article supplement — ACS Omega. 2023 Apr 27;8(18):16439–49. doi: 10.1021/acsomega.3c01531 (PMC10173442; doi:10.1021/acsomega.3c01531), 2023-04-27
Supplement: ao3c01531_si_001.pdf [file ao3c01531_si_001.pdf]

# Manganese Ion-induced Amyloid Fibrillation Kinetics of Hen Egg White-Lysozyme in Thermal and Acidic Conditions

Xiaodong Chen,<sup>1</sup> Lei Xing,<sup>2,\*</sup> Xinfei Li,<sup>1</sup> Ning Chen,<sup>1</sup> Liming Liu,<sup>1</sup>  
Jionghan Wang,<sup>1</sup> Xiaoguo Zhou,<sup>1,\*</sup> Shilin Liu<sup>1,\*</sup>

- 1. Department of Chemical Physics, University of Science and Technology of China, Hefei 230026, China*
- 2. State Key Laboratory of Analytical Chemistry for Life Science, School of Chemistry and Chemical Engineering, Nanjing University, Nanjing 210023, China*

\* Corresponding authors: [xl1992@nju.edu.cn](mailto:xl1992@nju.edu.cn) (L.X.)  
[xzhou@ustc.edu.cn](mailto:xzhou@ustc.edu.cn) (X.Z.)  
[sliu@ustc.edu.cn](mailto:sliu@ustc.edu.cn) (S.L.)

## Contents:

**Fig. S1** Curve fitting analyses of the amide I band profiles of HEWL after incubation for 144 h, in thermal/acid (a) and thermal/acid/Mn<sup>2+</sup> (b) conditions, where five Lorentzian-type functions are used to present the contributions of different protein secondary structures and Tyr residues.

**Table S1.** Curve fitting analyses of the amide I band profile of HEWL after incubation for 144 h, in thermal/acid or thermal/acid/Mn<sup>2+</sup> conditions, where the peak position (cm<sup>-1</sup>) and the relative ratio of each component (A%).



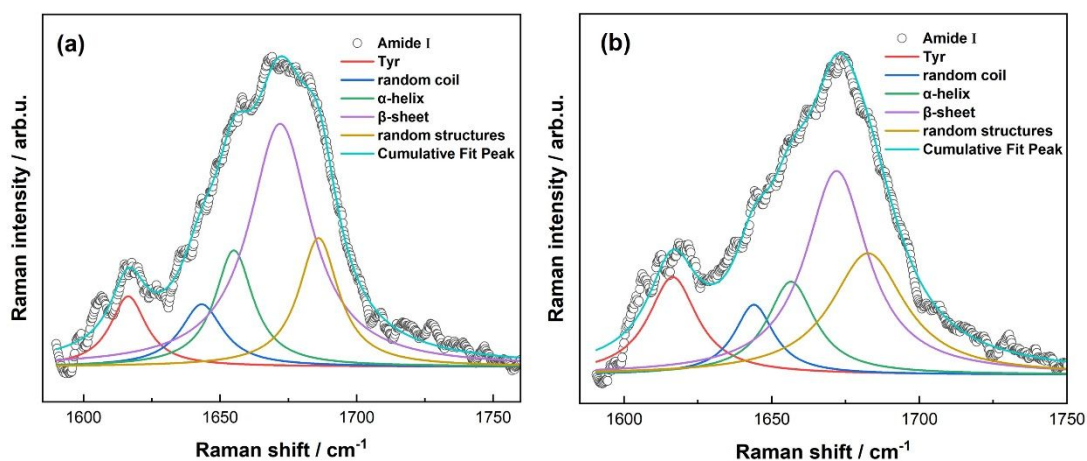

**Fig. S1** Curve fitting analyses of the amide I band profiles of HEWL after incubation for 144 h, in thermal/acid (a) and thermal/acid/ $Mn^{2+}$  (b) conditions, where five Lorentzian-type functions are used to present the contributions of different protein secondary structures and Tyr residues.

**Table S1.** Curve fitting analyses of the amide I band profile of HEWL after incubation for 144 h, in thermal/acid or thermal/acid/ $Mn^{2+}$  conditions, where the peak position ( $cm^{-1}$ ) and the relative ratio of each component (A%).

| Incubation conditions   | random coils |      | $\alpha$ -helix |      | $\beta$ -sheet |      | random structures |      |
|-------------------------|--------------|------|-----------------|------|----------------|------|-------------------|------|
|                         | Peak         | A%   | Peak            | A%   | Peak           | A%   | Peak              | A%   |
| thermal/acid            | 1643         | 0.10 | 1655            | 0.17 | 1672           | 0.55 | 1686              | 0.18 |
| thermal/acid/ $Mn^{2+}$ | 1644         | 0.09 | 1656            | 0.16 | 1672           | 0.44 | 1682              | 0.31 |
